# Supplementary material for: Breathing of the Nevado del Ruiz volcano reservoir, Colombia, inferred from repeated seismic tomography
Source: PubMed Central journal article supplement (PMC5385870; doi:10.1038/srep46094), 2017-04-10
Supplement: srep46094-s1.pdf [file srep46094-s1.pdf]

1 **Title: Breathing of the Nevado del Ruiz volcano reservoir, Colombia, inferred from**  
2 **repeated seismic tomography**

3 Carlos. A. Vargas<sup>1,\*</sup>, Ivan Koulakov<sup>2,3\*</sup>, Claude Jaupart<sup>4</sup>, Valery Gladkov<sup>2,3</sup>, Eliana Gomez<sup>1</sup>,  
4 Sami El Khrepy<sup>5,6</sup>, and Nassir Al-Arifi<sup>5</sup>

5 **Supplementary Information**

6 This material includes more details on the activity of the NRV and additional explanation of the  
7 computation and testing of the tomography model.

8 The Recent activity of NRV

9 Since its November 1985 eruption, NRV has been the most dynamic of the active  
10 volcanoes in Colombia. Volcano-tectonic and long-period seismic events have followed a  
11 periodic pattern<sup>6</sup>. The current instrumental monitoring period, which began in 1985, has been  
12 characterized by recurring emissions of ash and volcanic gas. However, with the exception of  
13 two seismic crises that began in November 1995 and June 2002, episodes of high seismic activity  
14 were accompanied by magmatic eruptions that were observed by local inhabitants and that were  
15 detected by independent methods.

16 From May 2012 to the present, inclinometers near to main crater (Arenas) show deflation  
17 - inflation cycles superimposed on a continuous inflation trend in association with emissions of  
18 ash and SO<sub>2</sub> ([Extended Data Figure S1](#)). Significant tilt changes from -550 to 400 microradians  
19 record magma ascent and the subsequent emplacement of a dome in the eastern sector of the  
20 Arenas Crater<sup>6</sup>. This lava dome had superficial and thermal expression from September to  
21 November 2015. A mosaic of images of the COSMO-SkyMed radar from the Italian Space  
22 Agency illustrates the growth of the dome<sup>6</sup>. Flights over the crater confirmed the interaction of

23 dome material with the superficial structure. Drumbeat-type seismicity is associated with this  
24 phenomenon<sup>7</sup>. Among its most striking features is the similarity with low energy VT events,  
25 occurring with comparable waveforms and energy at relatively regular time intervals. Episodes  
26 of drumbeat seismicity of short duration are still detected today.

27         The observations are consistent with a simple model of sulfur degassing<sup>23</sup> based on (1)  
28 gas accumulation beneath an impermeable cap during times of repose, and (2) periodic gas  
29 release when the cap ruptures. The continued release of SO<sub>2</sub> after each eruption suggests that the  
30 cap is gradually released over several years.

31         In juvenile solid material emitted during the 1985 and 1989 eruptions of the NRV, Stix et  
32 al.<sup>23</sup> found evidence for pre-eruptive magma emplacement at shallow levels in (1) anhydrous  
33 mineral assemblages of plagioclase and pyroxene, (2) high silica contents of glasses, and (3) low  
34 water contents in melt inclusions (averaging between 1.6 and 3.3 wt.%). They proposed a  
35 multistage model of magma transport and degassing that involves alternating periods of magma  
36 ascent and magma ponding. Initially, volatile-bearing magma ascends from a deep reservoir  
37 located at depths of 9 – 15 km, driven by buoyancy. During decompression, the magma loses  
38 gas, particularly CO<sub>2</sub> and sulfur. The magma eventually ponds at its neutral buoyancy level.  
39 Observations suggest a period of magma storage at shallow depths, where gas-saturated magma  
40 cools and crystallizes, thereby releasing gas. As a result, CO<sub>2</sub> is depleted from the residual melt  
41 whereas H<sub>2</sub>O and SiO<sub>2</sub> are enriched due to fractional crystallization. H<sub>2</sub>O enrichment is also due  
42 in part to increased solubility in the melt as CO<sub>2</sub> is degassed. Lastly, the density of the magma  
43 decreases as the level of dissolved H<sub>2</sub>O increases, eventually causing the magma to become  
44 buoyant and to resume its ascent.

45

46 Data and algorithms for repeated tomography

47 In this study, we use the catalog of arrival times of P and S seismic waves from local  
48 events recorded by permanent seismic stations at Nevado del Ruiz Volcano (NRV). There are  
49 57,646 events in the initial dataset, corresponding to 429,154 P-phases and 400,969 S-phases  
50 recorded by 124 seismic stations operated in the NRV area at different times. In this study, we  
51 used the data from 1998 onwards. Data from earlier times are available but were not used  
52 because they came from a relatively small number of stations.

53 The distributions of events for several time intervals are shown in [Extended Data Figure](#)  
54 [2](#). During the observation time, seismicity was largely concentrated beneath the summit area and  
55 started to migrate laterally towards the northwest and southwest in 2012.

56 We have selected data from four different time-intervals: 1998–2010, 2011–2012, 2013–  
57 2014, and 2015–2016, as indicated in [Figure 1B](#) by different colors. Here, we have considered  
58 the differences in the tomography results in periods 1, 3 and 4 with respect to results for the same  
59 period 2. This allowed us to avoid considerable differences in data distributions.

60 The data was selected to achieve maximum similarity of ray path distributions between  
61 the pairs of data subsets. The selection procedure was comprised of the following steps. (1) For  
62 the two-time episodes, we select one containing fewer data than another. (2) In this dataset, we  
63 range the events according to the number of picks per event from the maximum value, to the  
64 minimum one. (3) For the first event in the 1<sup>st</sup> dataset, we select all events in the 2<sup>nd</sup> dataset  
65 located at a distance less than a predefined value (0.5 km in our case). (4) For the selected events  
66 in the 2<sup>nd</sup> dataset, we count the number of common phases with the current event in the 1<sup>st</sup> subset  
67 (same stations and same types of wave, *P* or *S*). (5) We select one or several events having the  
68 maximum number of common phases. (6) In the case of several events with the same maximum  
69 number of common phases, we select one located at a minimum distance from the current event

70 in the 1<sup>st</sup> dataset. (7) The events are taken into consideration if the number of common phases is  
71 less than or equal to 8. The selected events are removed from both initial subsets. (8) The same  
72 procedure is repeated for the next event in the 1<sup>st</sup> subset. The numbers of the selected events and  
73 time pick in all cases are shown in [Extended Data Table 1](#). In all cases, the total number of  
74 involved stations was 19.

75 The inversion was performed using a modified version of the LOTOS code<sup>26</sup>. The  
76 procedure starts with preliminary source locations using a 1D reference model and the grid  
77 search method. To speed up the preliminary location, we used straight ray paths to calculate  
78 travel times. The 1D reference model was the same as in the case of locating the entire dataset  
79 prior to data selection.

80 The iterative inversion procedure contains the recurrent steps of source locations in the  
81 3D velocity model, matrix calculation, and the inversion. The source location procedure, in this  
82 case, uses the 3D bending algorithm for ray tracing<sup>27</sup>.

83 The 3D distributions of the *P*- and *S*-wave velocities are parametrized by a set of nodes  
84 distributed in the study area according to the density of rays. Between the nodes, the velocity is  
85 approximated continuously using the tri-linear interpolation. The grids are constructed in the first  
86 iteration; then the velocity anomalies are updated for the same nodes. To reduce the effect of the  
87 grid geometry on the result, we performed the inversions for several grids with different basic  
88 orientations ( $0^\circ$ ,  $22^\circ$ ,  $45^\circ$ , and  $66^\circ$  in our case), then computed the final model as the average of  
89 the resulting distributions. It is important that the grids be created for the first data subset; for the  
90 second subset, they are just copied from the first case.

91 The inversion was performed using the LSQR method<sup>28,29</sup>. We performed simultaneous  
92 inversions for the *P*- and *S*-velocity anomalies and source corrections (coordinates and origin

93 times). To stabilize the solution for the velocity distributions, we added two regularization  
94 matrices to the main matrix. One of them is diagonal, and it controls the amplitudes of the  
95 solutions in each parameterization node. Each row of the second matrix contains only two  
96 nonzero elements with the same values and opposite signs corresponding to all pairs of  
97 neighboring nodes in the grid. Changing the weight of this matrix leads to stronger or weaker  
98 flattening of the model.

99 We fixed the total number of iterations at three and further controlled the quality of the  
100 inversions by tuning the weights of the regularization matrices and source terms. The optimal  
101 values of the inversion parameters were determined according to the results of synthetic  
102 modeling, which are described below.

103

#### 104 Synthetic modeling

105 An important part of any tomography study is synthetic modeling, which allows an  
106 assessment of the spatial resolution of the results and the determination of optimal values for the  
107 inversion parameters. In this study, synthetic modeling is necessary to distinguish between the  
108 impact of different ray path configurations and real velocity variations at depth.

109 The synthetic data were computed by three-dimensional ray tracing through a predefined  
110 synthetic model. In the LOTOS code, there are several possibilities for defining synthetic  
111 anomalies, both in map view and in vertical profiles. After calculation of synthetic travel times  
112 between the actual distribution of sources and receivers, the data were perturbed with random  
113 noise (0.02 and 0.05 s in our case) that provides the same variance reduction as in the case of the  
114 experimental data analysis. Any information about the source coordinates and origin times was  
115 “forgotten”. The recovery procedure began with locating the events in the initial 1D model that

116 usually bias the sources significantly. The iterative inversion procedure and the inversion  
117 parameters used for recovering the synthetic model were identical to those for the experimental  
118 data.

119 To save space, we present the results of synthetic modeling for Series 1 only. For the  
120 other series, results appear to be similar and even better, because of a larger amount of data.

121 [Extended Data Figure S3](#) shows the results of the checkerboard test, in which the starting  
122 model is composed of periodic anomalies with a size of 2.5 km and magnitude of  $\pm 8\%$ . Signs for  
123 the P and S anomalies are opposite in order to generate large variations of the  $V_p/V_s$  ratio. With  
124 depth, the synthetic model remains unchanged. We performed an independent recovery of this  
125 model using the data subsets corresponding to time intervals 1998–2010 and 2011–2012. Results  
126 for both cases show that the main pattern is recovered ([Extended Data Figure S3](#)). In the bottom  
127 row, we present the difference between the recovered models. Deviations in the central part of  
128 the study area are less than 2% (note that the color scale interval for the difference is half that for  
129 the recovered models). A local instability in the S-velocity model is observed in the southwestern  
130 edge with a magnitude of  $\sim 4\%$ , which we attribute to a few event mislocations and differences in  
131 the ray configurations in this part of the study area. Nevertheless, the changes in the model are  
132 significantly smaller than the amplitude of the main anomalies.

133 Another series of tests is presented in [Extended Data Figure S4](#). In this case, we created  
134 synthetic models with realistic anomaly distributions in a vertical section, i.e. which are similar  
135 to those obtained using the real data. The anomalies were defined as polygons with unchanged  
136 shapes in the direction across the section. We defined the amplitudes of the P and S anomalies  
137 (pairs of numbers in each pattern) to ensure that the values of the  $V_p/V_s$  ratios are similar to those  
138 in the main experimental model. In the first case (middle column), we reconstructed identical

139 synthetic models (MODEL 1) using two data subsets corresponding to the time intervals of  
140 1998–2010 and 2011–2012. We can see that the differences in the recovered models of  $V_p/V_s$   
141 ratios are very small and do not exceed 0.03.

142 For the second case ([right column in Extended Data Figure S4](#)), we performed  
143 reconstructions of two considerably different models, 2 and 3. In particular, in Model 3, the  
144 value of the  $V_p/V_s$  deviation in the large anomaly at 2–3 km asl is significantly smaller than that  
145 in Model 2. The recovered results reveal robust changes between the models. This test is an  
146 important argument that this tomography scheme, which uses similar data configurations, does  
147 allow the retrieval of actual variations in the velocity structures. The calculated actual variations  
148 appear to be much more important than artifacts associated with noise and changes in ray  
149 distributions.

150

#### 151 Inversion of experimental data

152 Based on the experimental data, we computed a total of six models, two for each series.  
153 In all cases, we performed three iterations and used the same inversion parameters. The  
154 numerical characteristics of the inversions are presented in [Extended Data Table 1](#). It can be seen  
155 that the values of variance reduction computed in the L1 norm are relatively high compared to  
156 many tomography studies of similar scale in other volcanoes. For example, in the Klyuchevskoy  
157 volcano group<sup>14</sup>, the variance reduction for S-data was not greater than 25%, whereas here it  
158 reaches 53%. This may be due to the high quality of the data in this study and clear strongly  
159 complex geological structures, which are well recovered by the tomography inversion. It can also  
160 be seen that the norm of the residuals gradually decreases with time. For example, the final  
161 average deviation of the S-residuals in 1998–2010 is 0.0678 s, while in 2015–2016 it is 0.0473 s.

162 The corresponding variance reductions are 43.05% and 53.74%, respectively. This may indicate  
163 the increase of data quality in more recent data compared to older data. The lower variance  
164 reduction for the first time interval may also be caused by changes in the velocity structure  
165 during this extended period.

166 The resulting P and S velocity anomalies and  $V_p/V_s$  ratios for three series are shown in  
167 horizontal and vertical sections in [Extended Data Figures S5 to S10](#), in addition to the main  
168 result of the paper shown in [Figure 3](#). For the first series of the time intervals of 1998–2010 and  
169 2011–2012 ([Extended Data Figure S5 and S6](#)), we can see that the general shape of the  
170 anomalies remains consistent, especially for the  $P$  model. However, for the  $S$  model, we observe  
171 a considerable increase in the velocity. Such behavior of the  $P$  and  $S$  anomalies might indicate  
172 the migration of fluids, which does not affect the composition ( $P$  velocity), but strongly changes  
173 the shear modulus ( $S$  velocity).

174 In the vertical section, we see that beneath the volcano summit, the higher P velocity  
175 coexists with a strong negative S anomaly that results in a very high  $V_p/V_s$  ratio. In the first time  
176 interval, it exceeds 2.2, and in the second interval, it reaches 2.0. It should be noted that this  
177 anomaly of high  $V_p/V_s$  ratio matches a narrow, nearly vertical zone of seismicity just beneath the  
178 summit. The difference between the models in the first series shows that the structure is mostly  
179 changed by an increase of the S velocity to more than 10% beneath the summit at 2–3 km asl.  
180 This causes the corresponding decrease in the  $V_p/V_s$  ratio of more than 0.3.

181 It is important to compare the inversion results for the same interval of 2011–2012  
182 derived for the three series. We see some differences that are especially prominent for the S-  
183 velocity distribution. These differences are merely due to changes in the data configurations.  
184 This indicates that comparing results without constructing identical datasets might be risky.



185 Interestingly, despite considerable differences in the distributions of the P and S anomalies, the  
186 models of  $V_p/V_s$  ratios look more similar in this case.

187 For the second series ([Extended Data Figures S7 and S8](#)), we observe a further decrease  
188 in the  $V_p/V_s$  ratio beneath the volcano. In the period 2013–2014, at 2–3 km asl, where we expect  
189 the magma reservoir to be located, the  $V_p/V_s$  ratio appears to be close to the average value in the  
190 model. Some anomalies of higher  $V_p/V_s$  ratios are observed in the deeper part of the model,  
191 which probably indicates the location of the conduit bringing fluids from deeper sources.

192 In the vertical sections corresponding to all time intervals, we observe a strong shallow  
193 anomaly of high  $V_p/V_s$  ratio in the summit area. This can be interpreted as strongly fractured,  
194 highly saturated rocks, which remain almost unchanged during the entire observation period.

195 In the case of both series, we observe considerable changes in the  $P$  and  $S$  anomalies and  
196  $V_p/V_s$  ratios exceeding 10% in some places. These values are much stronger than the variations  
197 obtained in synthetic tests while recovering identical models. This observation implies that the  
198 changes in ray configurations, in this case, does not strongly affect the results, and the derived  
199 changes in both series represent actual changes in the Earth. These changes provide valuable  
200 information about the processes in the plumbing system beneath the Nevado del Ruiz volcano, as  
201 discussed in the main paper.

202 All the results presented in the paper can be reproduced using the data files and the  
203 program codes available at <http://www.ivan-art.com/science/LOTOS/repeatomo.zip>. This  
204 compressed file includes the Read\_Me.pdf file with detailed guidelines on how to perform the  
205 calculations.

206

207 Numerical estimates for the magma sources

208 NRV is known for its very large venting of SO<sub>2</sub> gas and provides an excellent example of  
209 the general problem of the origin of volcanic gasses. In many volcanoes, it has proven to be  
210 difficult to reconcile the sulfur and magmatic budgets, such that the amount of sulfur that is lost  
211 is larger than what can be accounted for by magma<sup>20</sup>. Magma sulfur concentrations are  
212 determined from melt inclusion and glass data but, by definition, only provide values for magma  
213 that has already undergone crystallization. Also, it is known that sulfur solubility is low  
214 compared to that of H<sub>2</sub>O, such that it may form gas at large pressures<sup>22</sup>. This has led to the  
215 conclusion that many magmas carry exsolved gas as they rise towards shallow storage zones<sup>21</sup>.  
216 Magma storage prior to the eruption, therefore, allows gas to escape and to get vented at the  
217 surface or through a near-surface hydrothermal system.

218 At NRV, melt inclusions and glass have highly variable silica, sulfur and water  
219 contents<sup>23</sup>, indicating that volatile-saturated melt underwent fractional crystallization at different  
220 depths. The water content of volatile-saturated melt is dictated by the solubility law and varies as  
221 a function of pressure and CO<sub>2</sub> content. The lowest water content of 1.6 wt% provides an  
222 estimate of the shallowest depth of storage<sup>23</sup>. Depending on the CO<sub>2</sub> concentration, this depth is  
223 constrained to be at least 0.8 km (corresponding to zero CO<sub>2</sub> concentration). Similarly, the  
224 largest water content of 3.3 wt% indicates a minimum storage depth of 3.1 km<sup>23</sup>. Allowing for  
225 crystallization in a reservoir that is not a thin sill-like body, these two different estimates may be  
226 interpreted as indicative of the thickness of the shallow reservoir of Nevado del Ruiz. We note  
227 that these depths are consistent with our tomographic results which delineate a magma zone  
228 extending from about 2 to 4 km depth beneath the volcano summit.

229 We can also estimate the minimum magma volume using the amount of sulfur or water  
230 and assuming that it got degassed passively before the 2015 dome-building eruption. The total

231 mass of SO<sub>2</sub> gas erupted in the 2012-2015 period, over four years, is 7x10<sup>6</sup> tons. The total  
232 amount of sulfur in subduction zone magmas has been reconstructed using phase equilibria  
233 relationships and data on both gas and melt<sup>20</sup>, and is between 0.05 and 0.5 wt% with very rare  
234 exceptions. Using an average value of 0.1 wt%, we can estimate the amount of melt that is  
235 required to supply the mass of SO<sub>2</sub> gas that got vented. The amount of sulfur is 3.5x10<sup>6</sup> tons,  
236 corresponding to a mass of melt of about 4x10<sup>12</sup> kg. For an average density of andesite magma of  
237 2600 kgm<sup>-3</sup>, this corresponds to a volume of 1.4x10<sup>9</sup> m<sup>3</sup> and an average diameter of about 1.4  
238 km. An alternative calculation can be made using SO<sub>2</sub>/H<sub>2</sub>O ratios, which are typically between  
239 2% and 5% by weight<sup>20</sup>. At the neighboring Galeras volcano, this ratio is 3%<sup>20</sup>. We can,  
240 therefore, convert the mass of SO<sub>2</sub> vented into one of 2.3x10<sup>11</sup> kg for H<sub>2</sub>O. Assuming that magma  
241 entered the shallow reservoir with 3.3 wt% H<sub>2</sub>O and that it progressively degassed to a  
242 concentration of 1.6 wt%<sup>23</sup>, we obtain a magma volume of 5x10<sup>9</sup> m<sup>3</sup> and a reservoir diameter of  
243 about 2 km. These estimates depend on various ratios that are not known precisely and are only  
244 accurate to within a factor of about 2. The orders of magnitude, however, are well constrained  
245 and lead to reservoir volumes that are consistent with our independent seismological estimate.

246 We can relate these observations to the melt budget of the reservoir. The total volume of  
247 the reservoir may change as a function of the reservoir average pressure  $P_R$  through deformation  
248 of the wall rocks. Changes of pressure induce changes of dissolved volatile content and density,  
249 such that one can define an effective compressibility  $\beta$ , which is much larger than that of the wall  
250 rocks<sup>25</sup>. The pressure change can be calculated as follows<sup>24,25</sup>:

251 
$$V \beta \frac{dP_R}{dt} = Q_{in}/\rho - Q_{out}/\rho_g + Q_{cryst}$$

252 where  $V$  is the reservoir volume,  $P_R$  pressure,  $Q_{in}$  the mass flux of magma into the  
253 reservoir at density  $\rho$ ,  $Q_{out}$  the mass flux of gas leaving the reservoir at density  $\rho_g$ . The last term  
254 on the right-hand side is:

$$255 \quad Q_{cryst} = - V/\rho \partial \rho / \partial t dT/dt$$

256 where  $T$  is temperature, which is positive and represents a contribution due to  
257 crystallization, which acts to increase the volatile content of the residual melt and gas mixture.  
258 Assuming that there is no recharge ( $Q_{in}=0$ ), for example, this equation has a steady-state solution  
259 with no change of pressure such that the amount of volatile that gets exsolved due to  
260 crystallization balances the amount of gas that gets vented out of the reservoir. A solution to this  
261 equation requires two closure relationships specifying how the inputs and outputs ( $Q_{in}$  and  $Q_{out}$ )  
262 vary as a function of reservoir pressure.

263 In an open conduit system connecting the shallow reservoir to a deeper magma source  
264 located at vertical distance  $h$  beneath the shallow reservoir ([Extended Data Figure S11](#)), the  
265 pressure difference driving the flow of magma into the reservoir can be written as:

$$266 \quad \Delta P = P_S - P_R - \rho g h$$

267 where  $P_S$  is the source pressure. This shows that magma replenishment is enhanced by  
268 decreasing pressure in the shallow reservoir. It also shows that replenishment ceases when  
269 pressure in the shallow reservoir reaches a value equal to  $(P_S - \rho g h)$ .

270 The driving pressure for gas venting, assuming permeable roof rocks, will always be  
271 positive and large owing to the small density of gas. Thus, the control on the rate of degassing is  
272 mostly due to the permeability, which is unknown, and to the availability of gas in the reservoir.

273 These simple considerations allow the following model for the 1998-2015 behavior of  
274 NRV. A large volatile-saturated magma batch emplaced in the shallow reservoir is degassing and

275 crystallizing. Gas bubbles rise through magma due to buoyancy, leading to a gas-depleted region  
276 that grows at the base of the reservoir. Simultaneously, crystallization leads to an increasing  
277 crystal content in the lower part of the reservoir. During that time, it is hard to predict changes of  
278 the reservoir pressure, which could be positive or negative depending on the respective  
279 magnitudes of the various terms in the pressure equation above. One important fact is that  
280 pressure changes are likely to be small due to the contribution of crystallization (i.e.  $Q_{cryst}$ ) and to  
281 the large value of compressibility in a gas-rich reservoir. The 2015 eruption implied the rapid  
282 loss of a significant mass and volume from the reservoir, which led to decrease of the reservoir  
283 pressure  $P_R$ . One of the consequences, as shown by the driving pressure equation, is  
284 replenishment of the reservoir by magma from the deeper source. This is consistent with a  
285 change of  $V_p/V_s$  in the deeper part of the storage zone, which can be interpreted as due to a batch  
286 of new magma.

287         Degassing of the reservoir is fed by gas bubbles rising through the reservoir. With time,  
288 as stated above, one expects that a degassed region grows at the base of the reservoir. If one can  
289 track the rise of the boundary between the gas-depleted lower region and the gas-rich upper  
290 region, one can estimate an average ascent rate for gas bubbles. According to our tomographic  
291 images, this rate is about 1 km per 4 years or about  $10^{-5} \text{ ms}^{-1}$ . Using the well-known formula for  
292 the velocity of gas bubbles through melt:

$$293 \quad V = 1/3 (a^2 \rho g) / \mu$$

294         where  $a$  is the bubble radius,  $\rho$  the melt density,  $\mu$  the melt viscosity and where we have  
295 assumed that the density and viscosity of gas are very much smaller than those of melt. For  
296 volatile-saturated andesitic melt at the base of the reservoir with 3.3 wt% dissolved  $\text{H}_2\text{O}$ , the  
297 viscosity is about  $10^4 \text{ Pas}^{23}$ . For the velocity estimate of  $10^{-5} \text{ ms}^{-1}$ , bubbles with 3 mm radii are  
298 required.

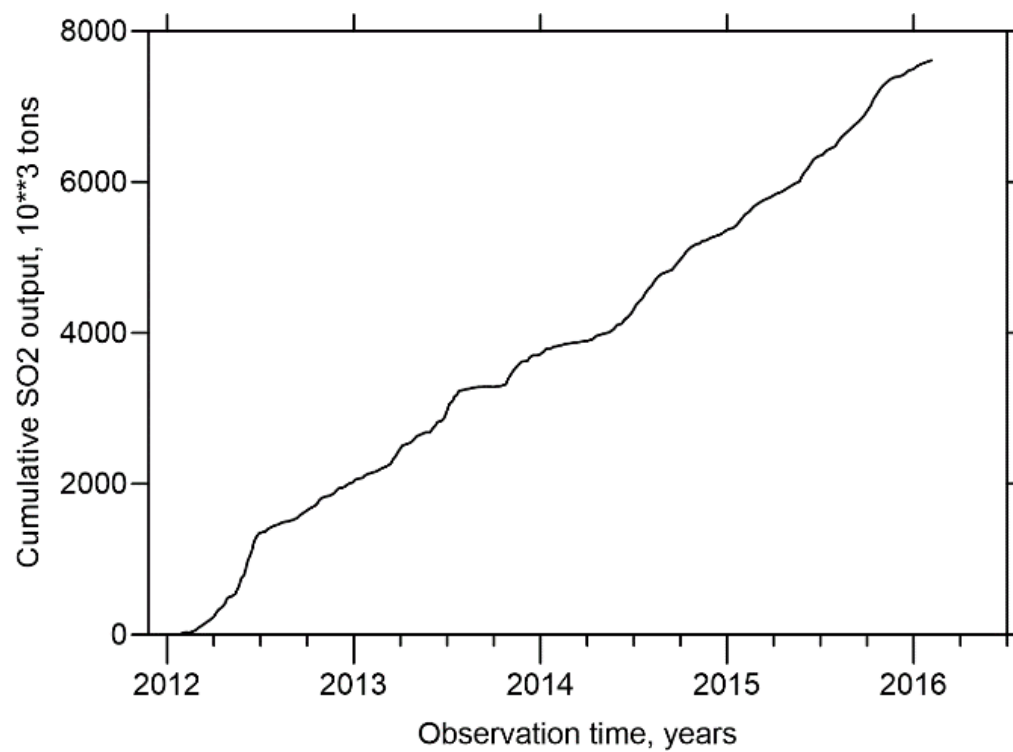

**Extended Data Figure S1.** Graph of the cumulative output of SO<sub>2</sub> from NRV measured by the Manizalez Volcanological Observatory<sup>6</sup>.

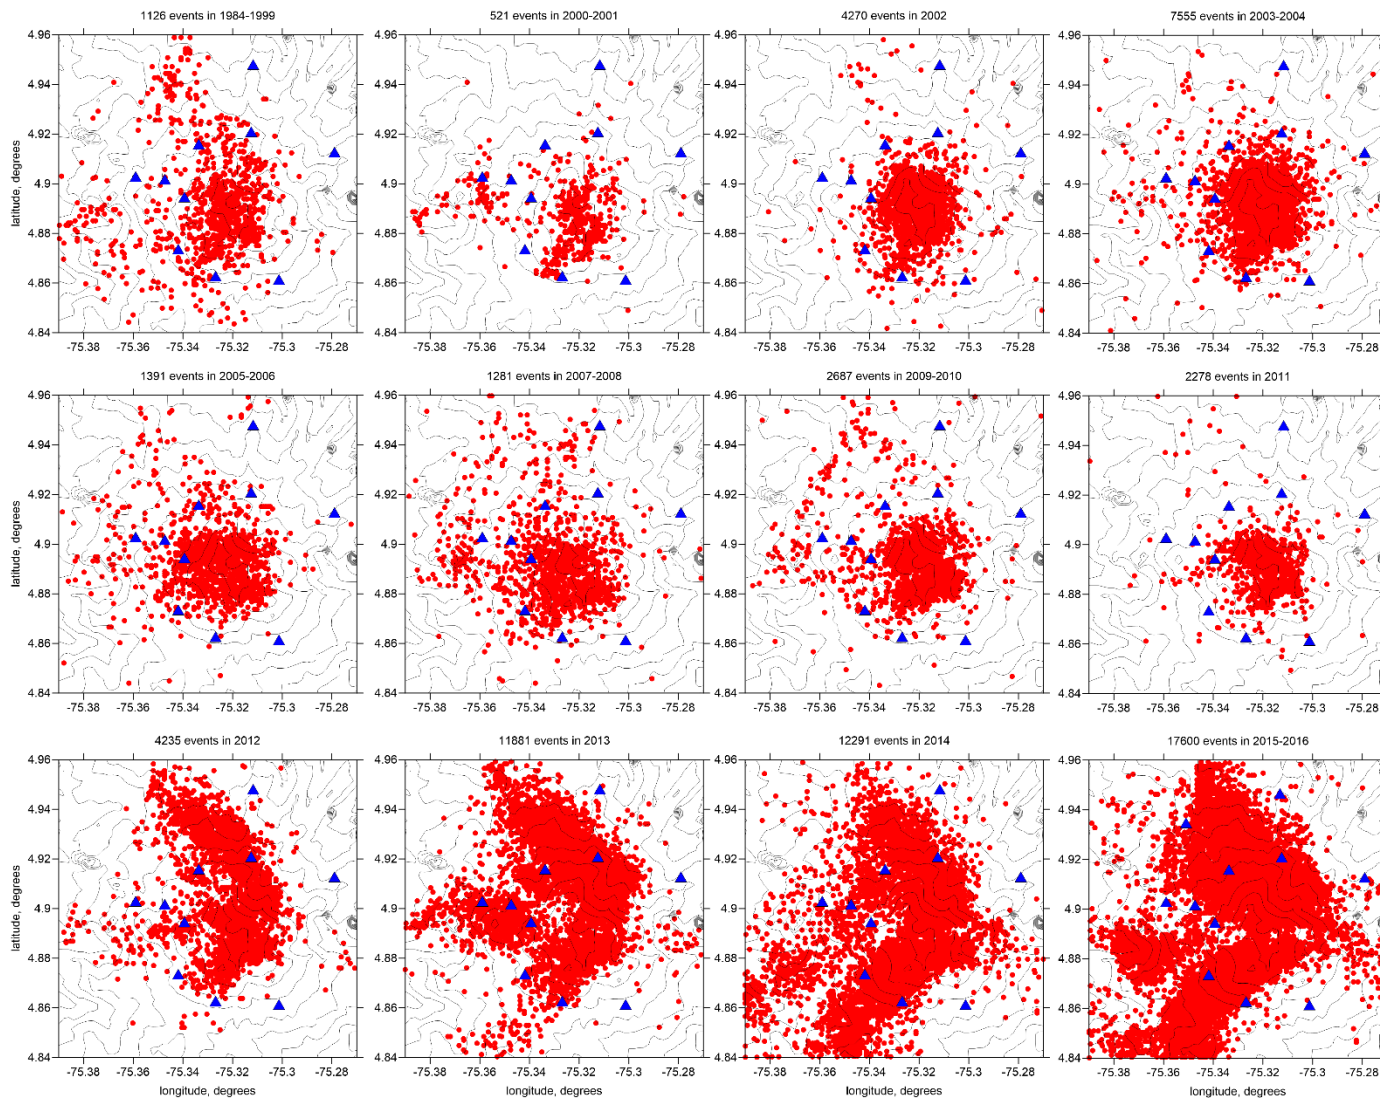

**Extended Data Figure S2.** The distributions of events in different times of observations. The time of the interval and the number of events are indicated above each plot. The red dots are the earthquakes, and the blue triangles are the seismic stations. Contour lines depict the relief<sup>30</sup>. This picture is produced using Surfer 12, Golden Software<sup>31</sup>.

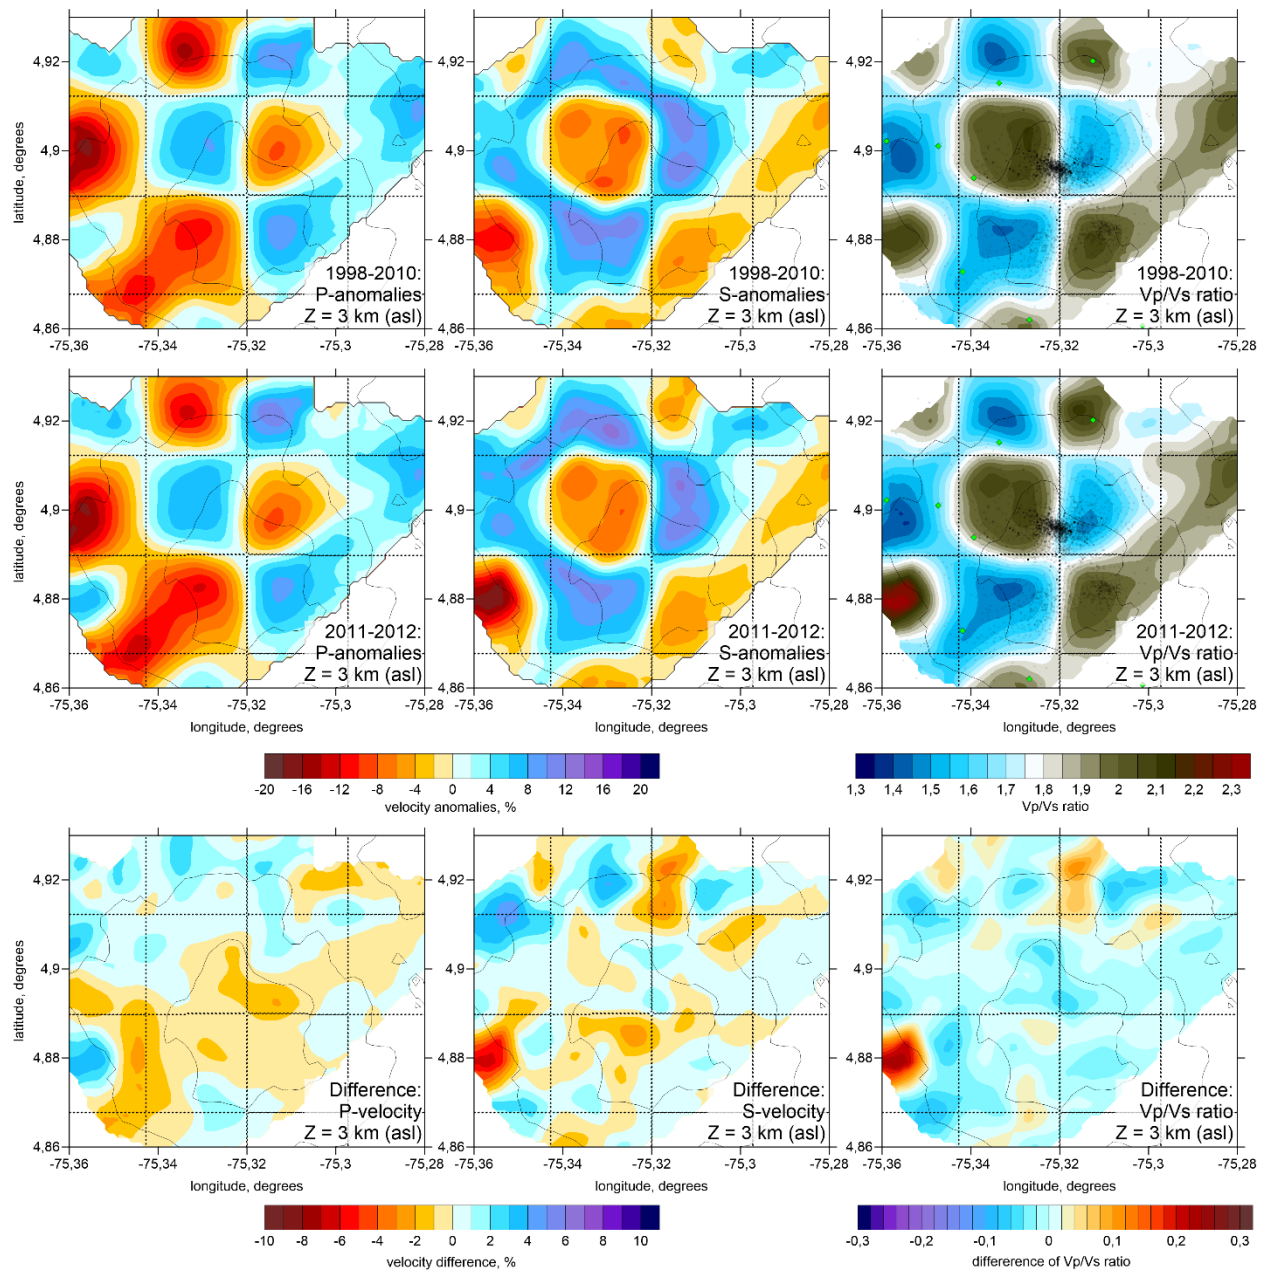

**Extended Data Figure S3.** An example of the checkerboard test for the Series 1. Upper two rows show the inversion results at the altitude of 3 km for the P- and S anomalies and Vp/Vs ratio. The lower row is the difference between these models. The shapes of the initial synthetic anomalies are depicted with dotted lines. The contour lines depict the relief<sup>30</sup>. Note that the color scale intervals for the anomalies and differences are different. This picture is produced using Surfer 12, Golden Software<sup>31</sup>.



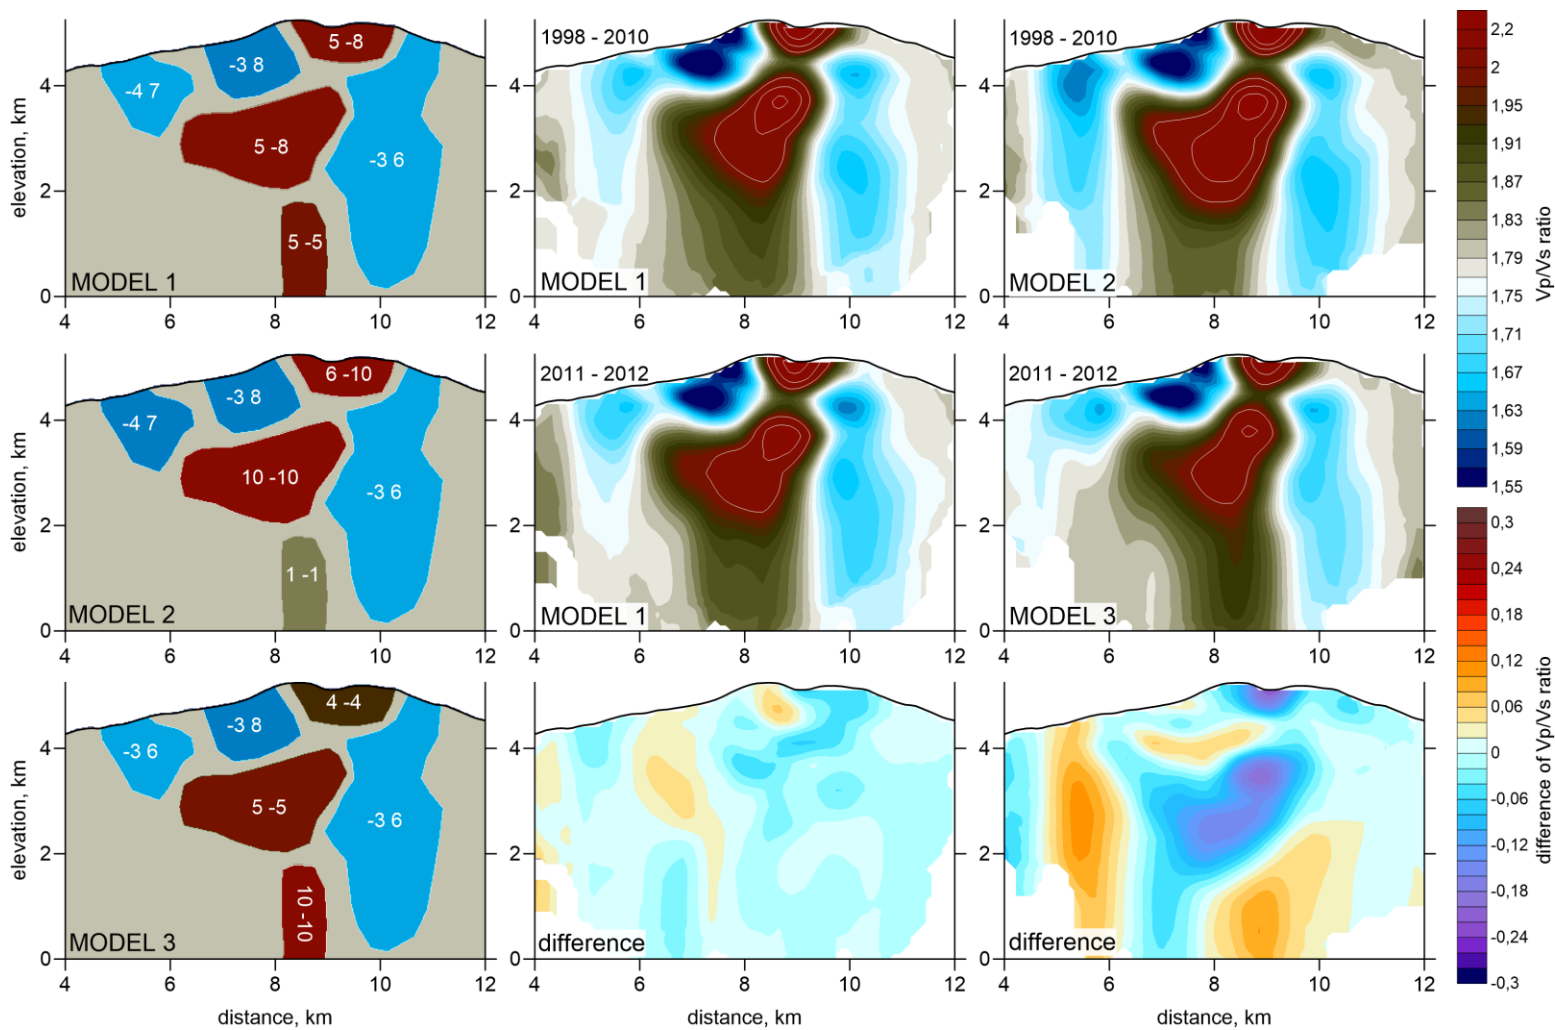

**Extended Data Figure S4.** Results of modeling the repeated tomography for the Series 1 with synthetic anomalies of realistic shape. Left column presents the shapes of the initial anomalies of Vp/Vs ratio for three different models. Number pairs indicate the values of P and S anomalies in percent. Middle row is the recovering results in the case of the same synthetic Model 1 and difference (lower plot). Right column presents the reconstruction results and the difference between two different models 2 and 3. This picture is produced using Surfer 12, Golden Software<sup>31</sup>.

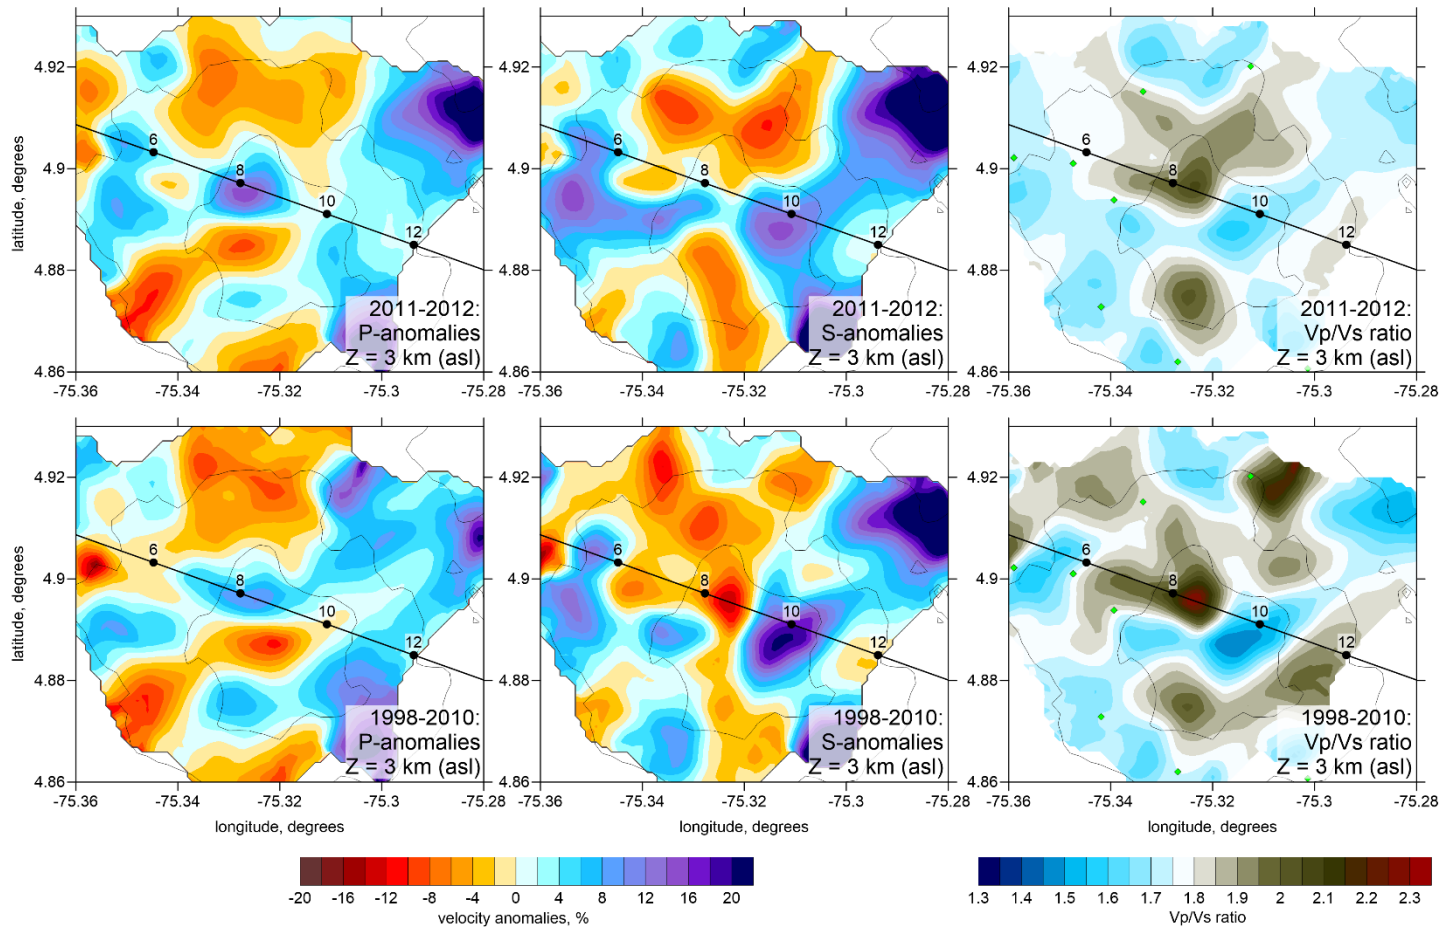

**Extended Data Figure S5.** Results of experimental data inversions for two-time intervals corresponding to the series 1 at the altitude of 3 km asl. The distributions of the P and S anomalies and Vp/Vs ratios are presented. The line indicates the location of the vertical section used for presenting the main results. The contour lines depict the relief<sup>30</sup>. Note that the color scale intervals for the anomalies and differences are different. This picture is produced using Surfer 12, Golden Software<sup>31</sup>.

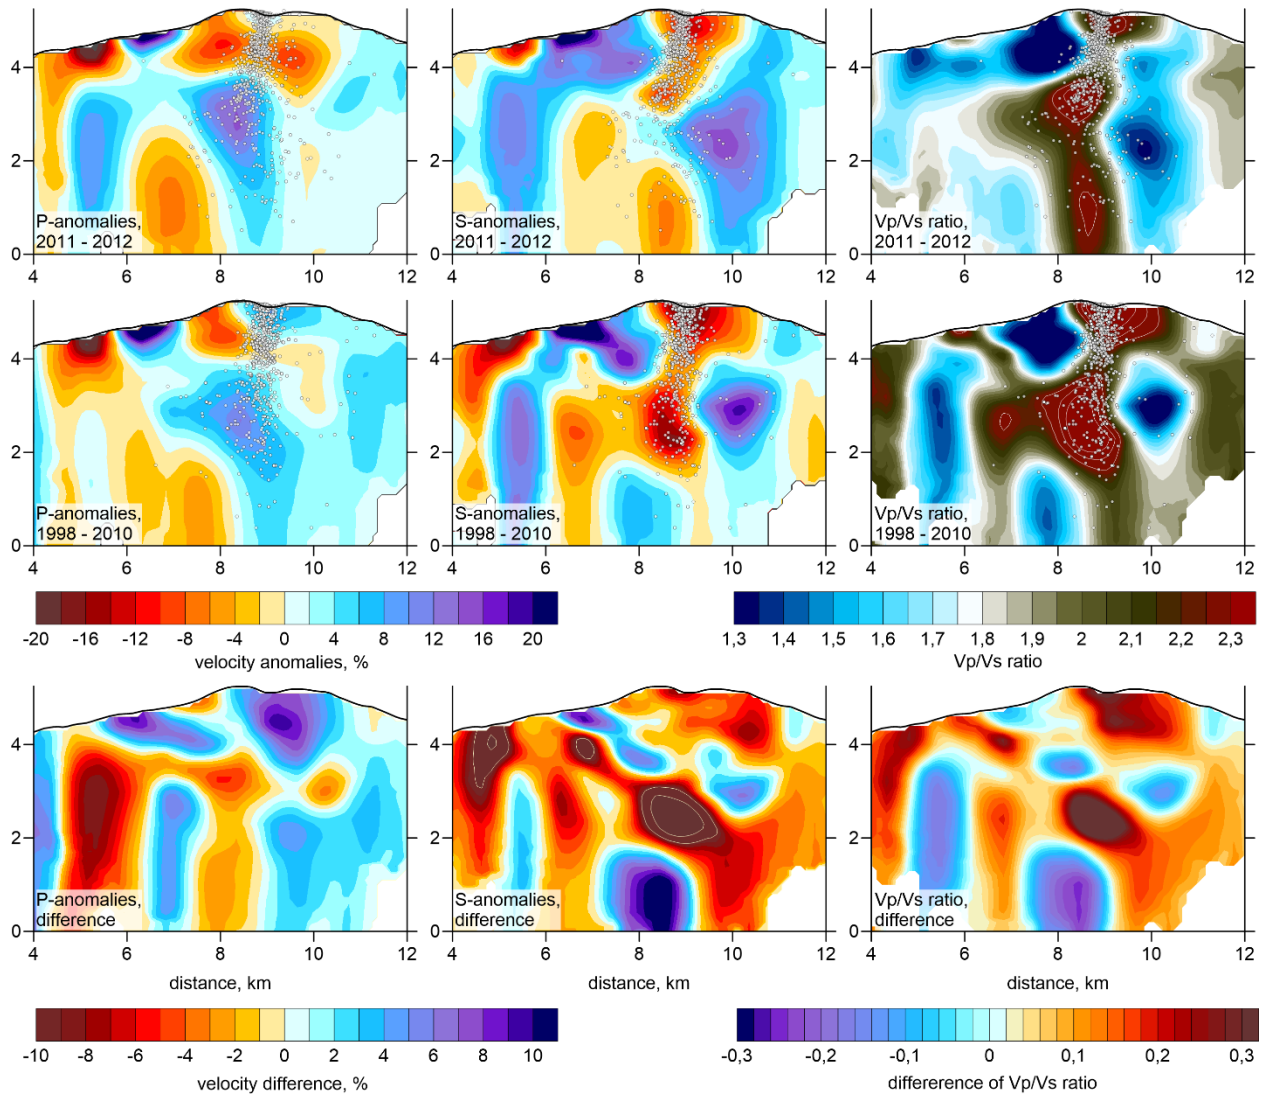

**Extended Data Figure S6.** Results of experimental data inversions for two-time intervals corresponding to the series 1 in the vertical section. The distributions of the P and S anomalies and Vp/Vs ratios and their differences are presented. The dots depict the earthquakes located at distances of less than 0.4 km from the profile. This picture is produced using Surfer 12, Golden Software<sup>31</sup>.

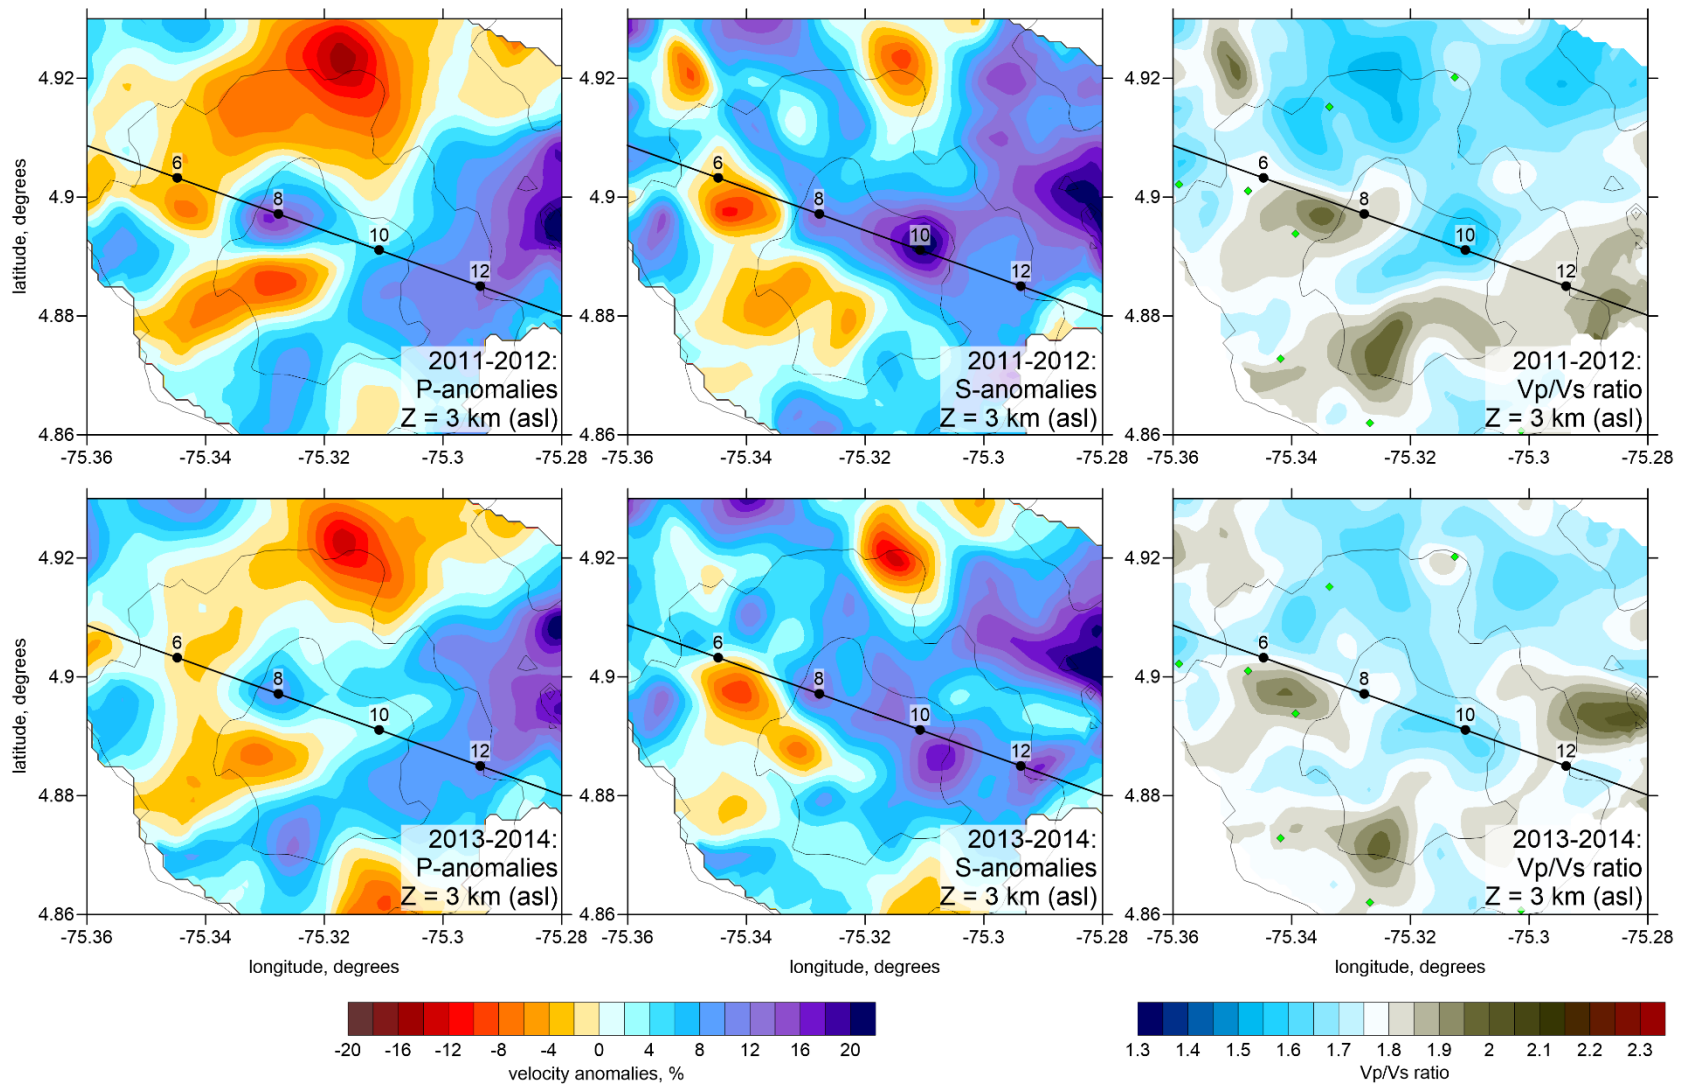

**Extended Data Figure S7.** Same as Extended Data Figure S6, but for the Series 2.

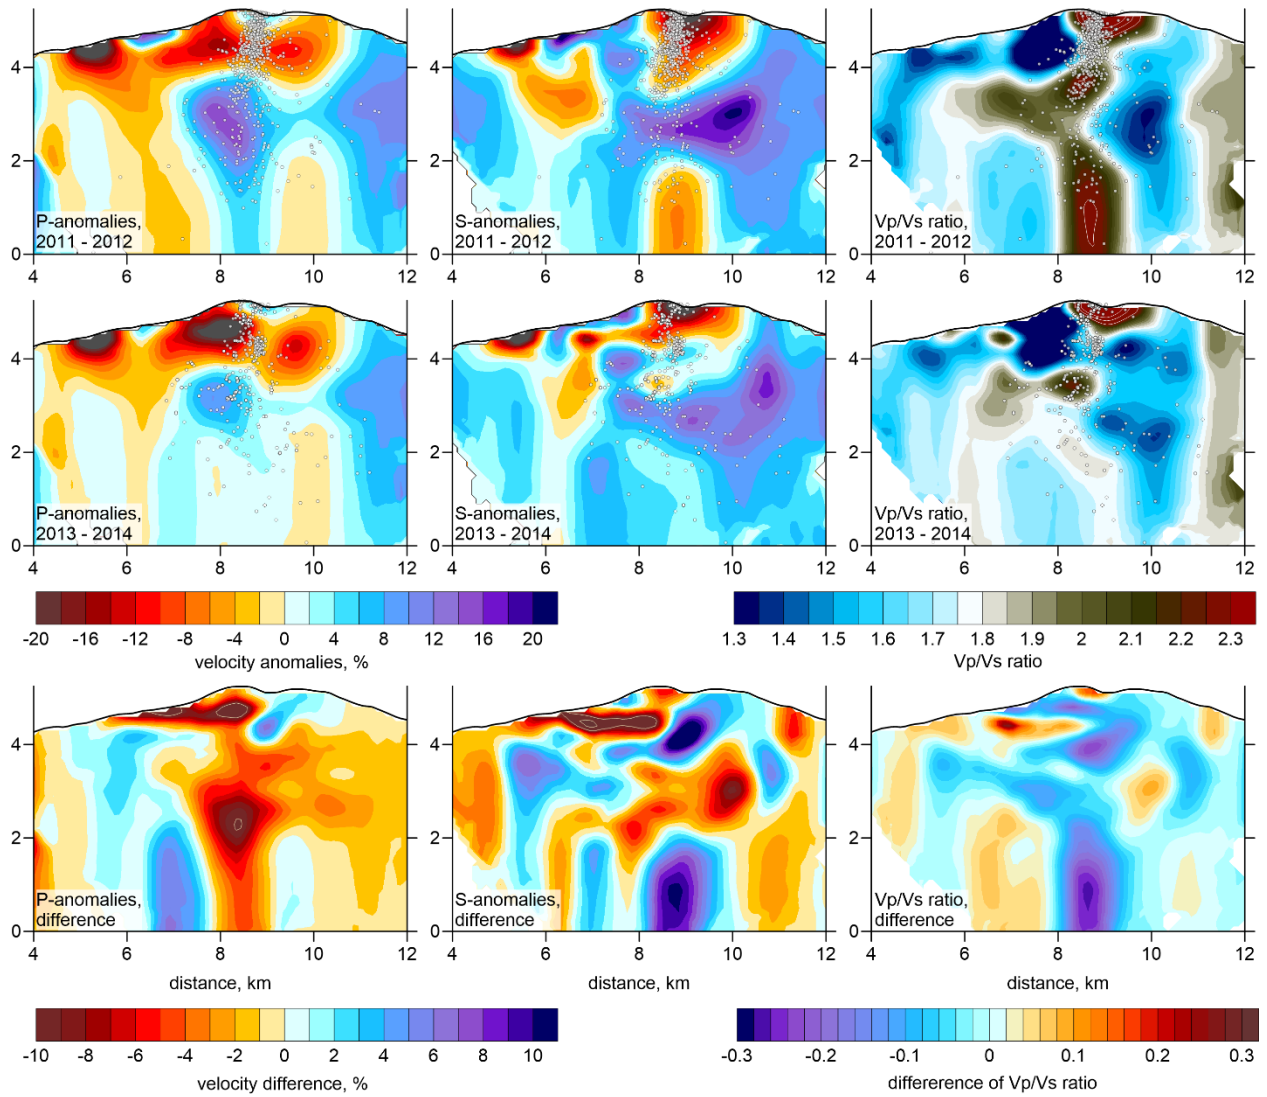

**Extended Data Figure S8.** Same as Extended Data Figure S7, but for the Series 2.

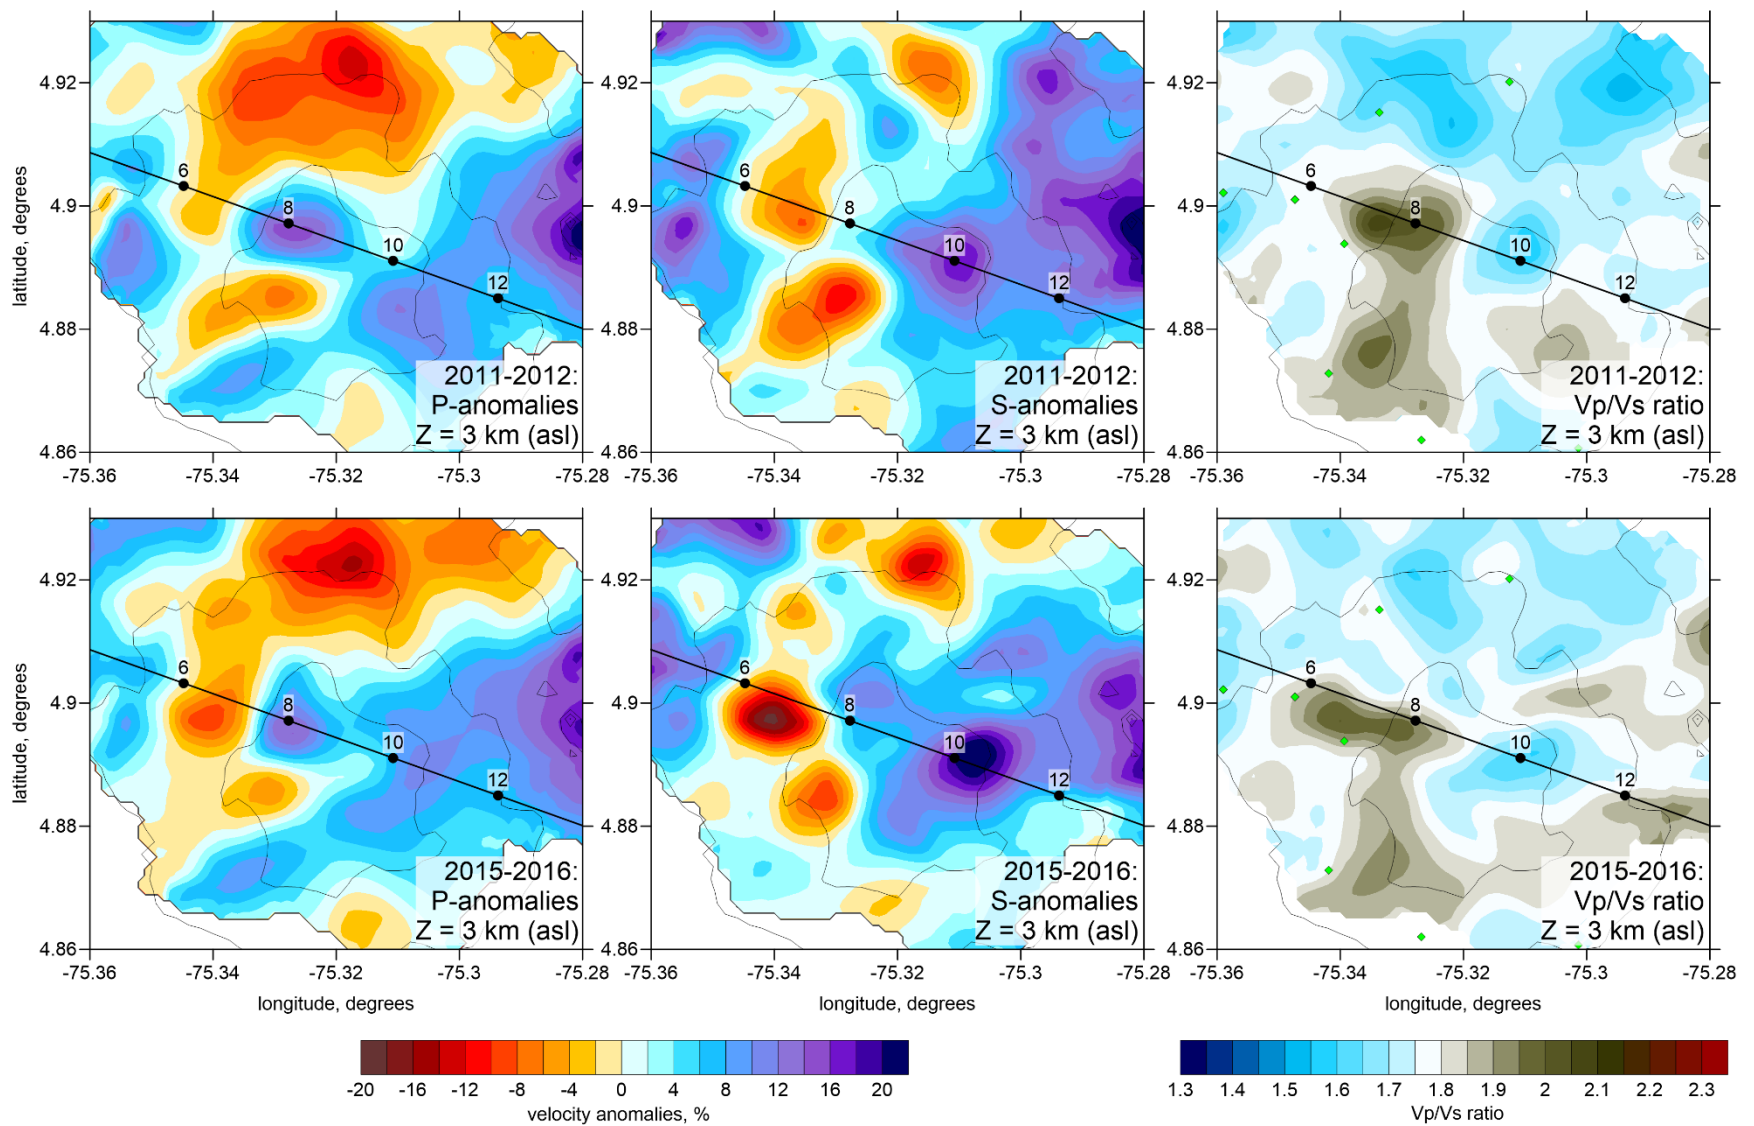

Extended Data Figure S9. Same as Extended Data Figure S6, but for the Series 3.

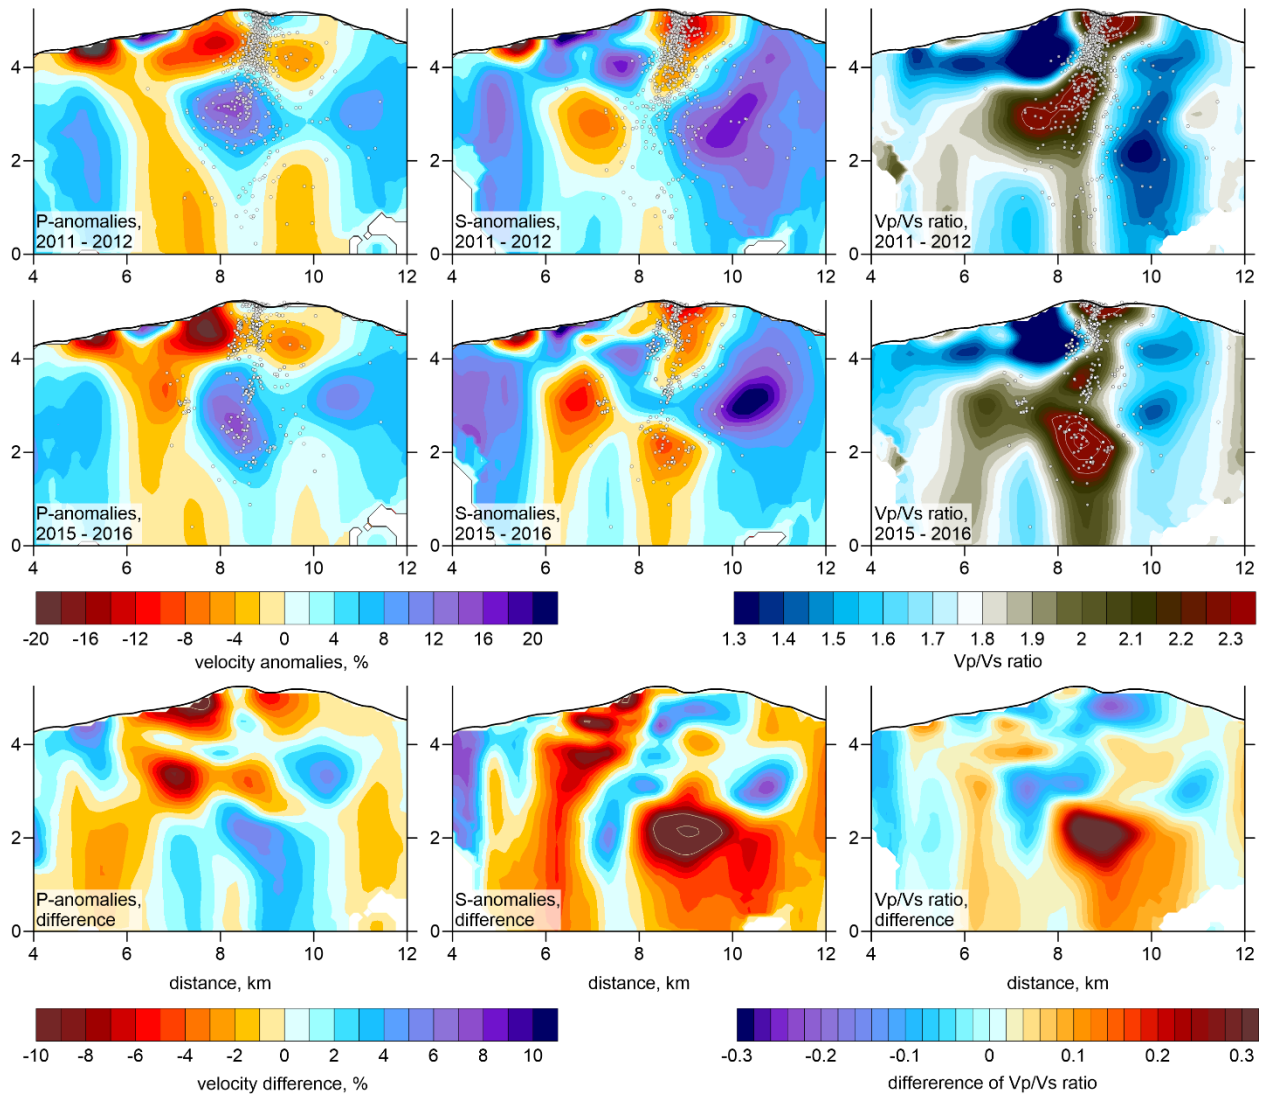

**Extended Data Figure S10.** Same as Extended Data Figure S7, but for the Series 3.

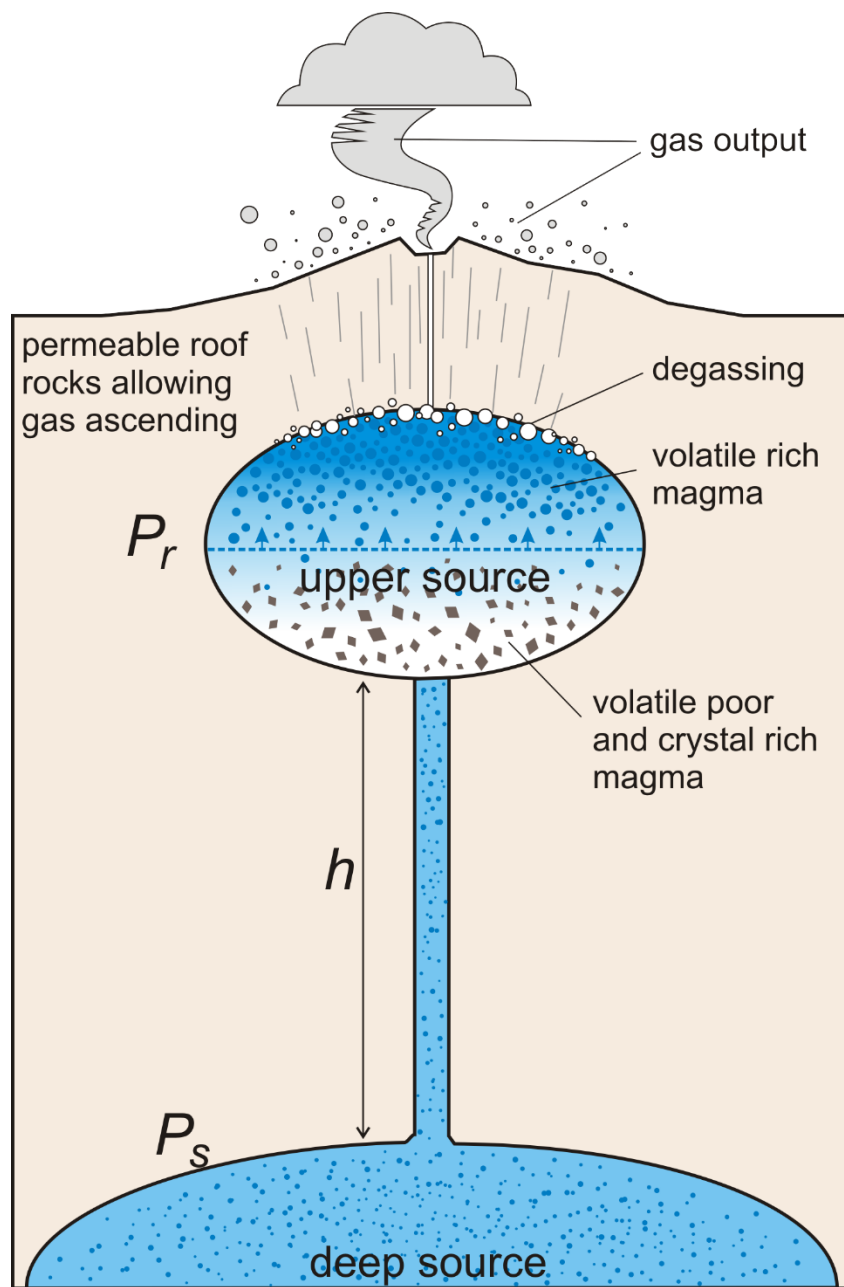

**Extended Data Figure S11.** Simplified scheme of magma sources used for numerical estimates in the text.



**Extended Data Table 1.** Information about numbers of data and values of residuals for two series of repeated tomography inversions

| Series   | Time intervals | Number of events | Data type: | Number of rays | Starting residuals | Final residuals | Residual reduction, % |
|----------|----------------|------------------|------------|----------------|--------------------|-----------------|-----------------------|
| Series 1 | 2011-2012      | 4487             | P-data:    | 28725          | 0.0722             | 0.0512          | 33.64                 |
|          |                |                  | S-data     | 26747          | 0.1127             | 0.0653          | 41.99                 |
|          | 1998-2010      | 4487             | P-data:    | 28725          | 0.0789             | 0.0522          | 33.86                 |
|          |                |                  | S-data     | 26747          | 0.1192             | 0.0678          | 43.05                 |
| Series 2 | 2011-2012      | 6036             | P-data:    | 44051          | 0.0830             | 0.0556          | 39.38                 |
|          |                |                  | S-data     | 41712          | 0.1323             | 0.0749          | 49.76                 |
|          | 2013-2014      | 6036             | P-data:    | 44051          | 0.0717             | 0.0396          | 44.69                 |
|          |                |                  | S-data     | 41712          | 0.1195             | 0.0555          | 53.51                 |
| Series 3 | 2011-2012      | 5913             | P-data:    | 38862          | 0.0801             | 0.0498          | 37.78                 |
|          |                |                  | S-data     | 36865          | 0.1233             | 0.0639          | 48.12                 |
|          | 2015-2016      | 5913             | P-data:    | 38862          | 0.0625             | 0.0352          | 43.65                 |
|          |                |                  | S-data     | 36865          | 0.1024             | 0.0473          | 53.79                 |
